# Supplementary material for: Genome-Wide Transcriptome Profiling of Mycobacterium smegmatis MC2 155 Cultivated in Minimal Media Supplemented with Cholesterol, Androstenedione or Glycerol
Source: MDPI journal article supplement (doi:10.3390/ijms17050689), 2016-05-07
Supplement: s1 [file s1]

# Supplementary Materials: Genome-Wide Transcriptome Profiling of *Mycobacterium smegmatis* MC<sup>2</sup> 155 Cultivated in Minimal Media Supplemented with Cholesterol, Androstenedione or Glycerol

Qun Li, Fanglan Ge, Yunya Tan, Guangxiang Zhang and Wei Li

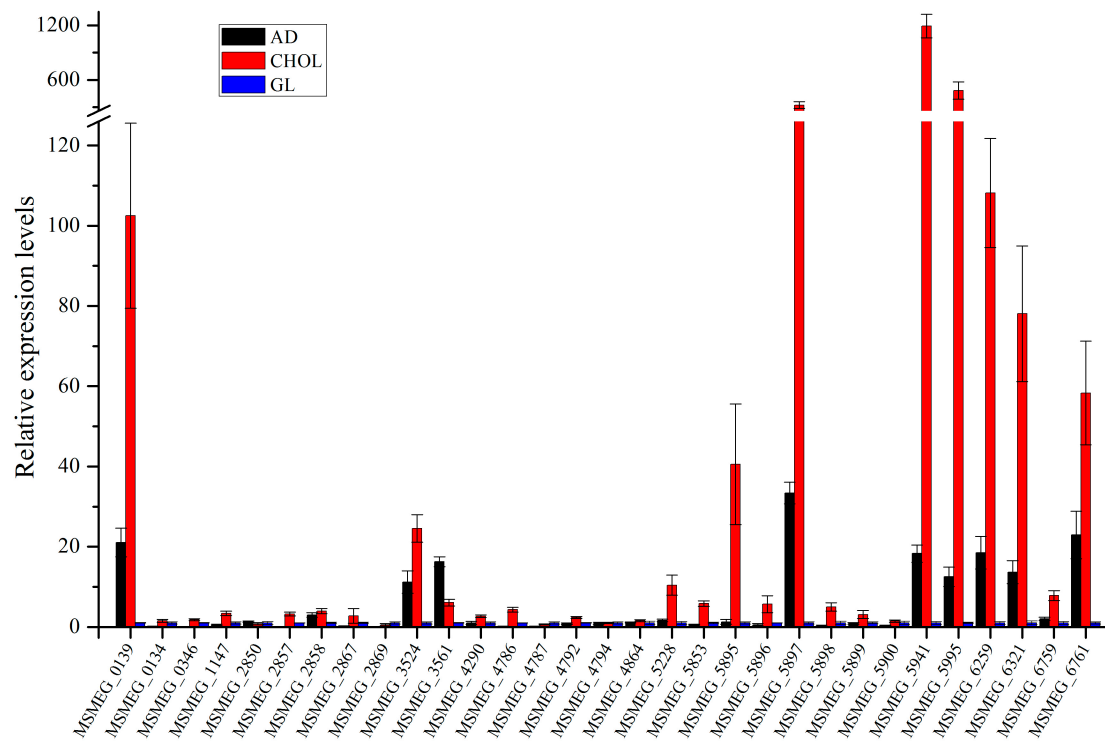

Figure S1. qRT-PCR results of some selected genes.
